# Supplementary material for: TRIM10 Is Downregulated in Acute Myeloid Leukemia and Plays a Tumor Suppressive Role via Regulating NF-κB Pathway
Source: MDPI journal article supplement (doi:10.3390/cancers15020417), 2023-01-08
Supplement: s1 [file s1]

# TRIM10 Is Downregulated in Acute Myeloid Leukemia and Plays a Tumor Suppressive Role via Regulating NF- $\kappa$ B Pathway

Lin Li, Qi Li, Zhengrong Zou, Zoufang Huang and Yijian Chen

**Table S1.** Primers used for the qRT-PCR analysis.

| Primer Name            | Sequence (5'→3')       |
|------------------------|------------------------|
| TRIM10-forward         | TGCTTGAGTTGGACTATGAGCC |
| TRIM10-reverse         | GGTTGTCTGGTGAGTTCTGCCA |
| DNMT1-forward          | AGGTGGAGAGTTATGACGAGGC |
| DNMT1-reverse          | GGTAGAATGCCTGATGGTCTGC |
| DNMT3A-forward         | CCTCTTCGTTGGAGGAATGTGC |
| DNMT3A-reverse         | GTTCCGCACATGAGCACCTCA  |
| DNMT3B-forward         | TAACAACGGCAAAGACCGAGGG |
| DNMT3B-reverse         | TCCTGCCACAAGACAAACAGCC |
| ABL1-forward           | GATACGAAGGGAGGGTGTACCA |
| ABL1-reverse           | CTCGGCCAGGGTGTGAA      |
| $\beta$ -actin-forward | GGACTTCGAGCAAGAGATGG   |
| $\beta$ -actin-reverse | AGCACTGTGTTGGCGTACAG   |

**Table S2.** Primers used for the methylation-specific PCR (MSP) analysis.

| Primer Name | Sequence (5'→3')                  |
|-------------|-----------------------------------|
| TRIM10-M F  | GTAGTTGGGATTATAGGCGTCG            |
| TRIM10-M R  | TTAAAATCCGATATATTAACCGAAC         |
| TRIM10-U F  | AGTTGGGATTATAGGTGTTGG             |
| TRIM10-U R  | AAAAACCTTTAAAATCCAATATATTAACCA    |
| ALU-F       | TTAGGTATAGTGGTTATATTTGTAATTTAGTA  |
| ALU-R       | ATTAACATAACTAATCTTAAACTCCTAACCTCA |

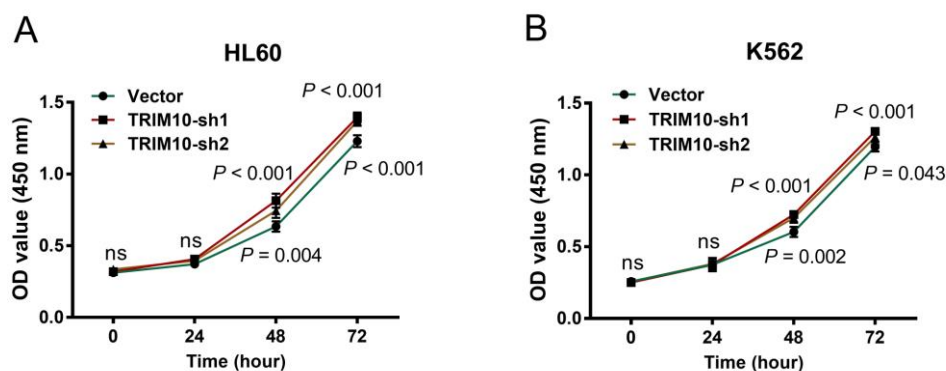

**Figure S1.** Growth curves of HL60 empty vector, HL60 TRIM10-sh1, HL60 TRIM10-sh1, K562 empty vector, K562 TRIM10-sh1, and K562 TRIM10-sh2 AML cell lines by measuring optical density (OD) value at 450 nm using CCK-8 analysis.
