# Supplementary figures and images for: TRIM10 Is Downregulated in Acute Myeloid Leukemia and Plays a Tumor Suppressive Role via Regulating NF-κB Pathway
Source: MDPI journal article supplement (doi:10.3390/cancers15020417), 2023-01-08

Figure 1C

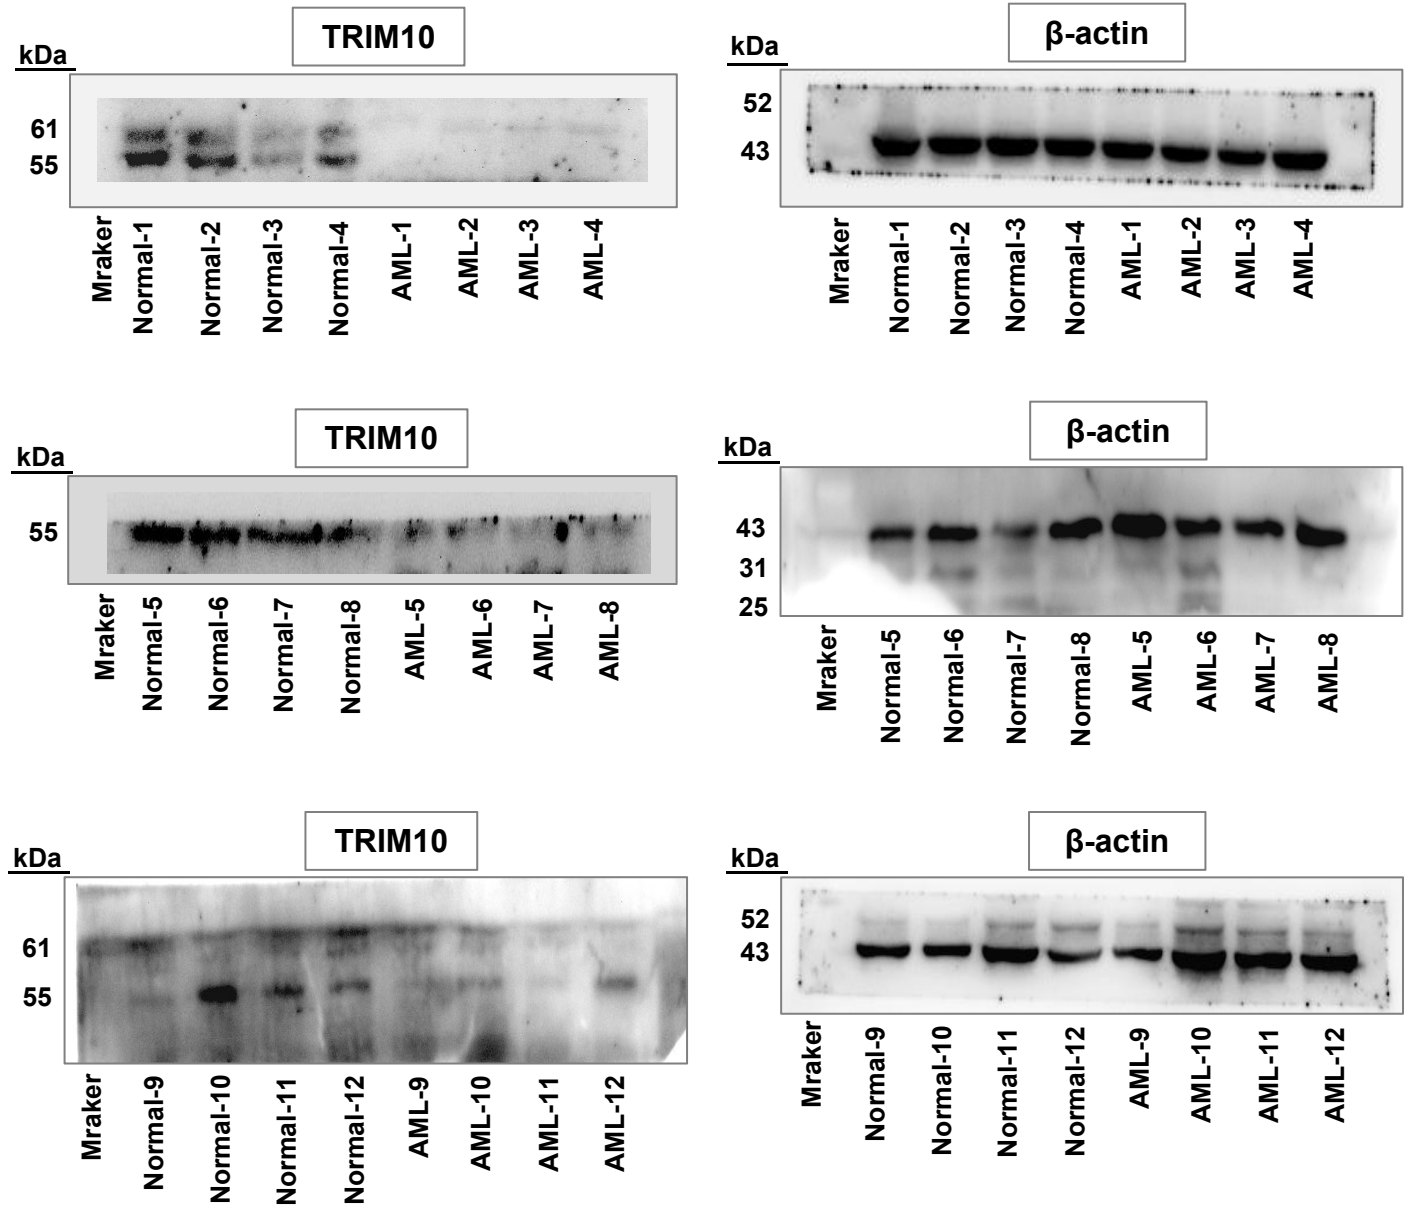

Figure 2A

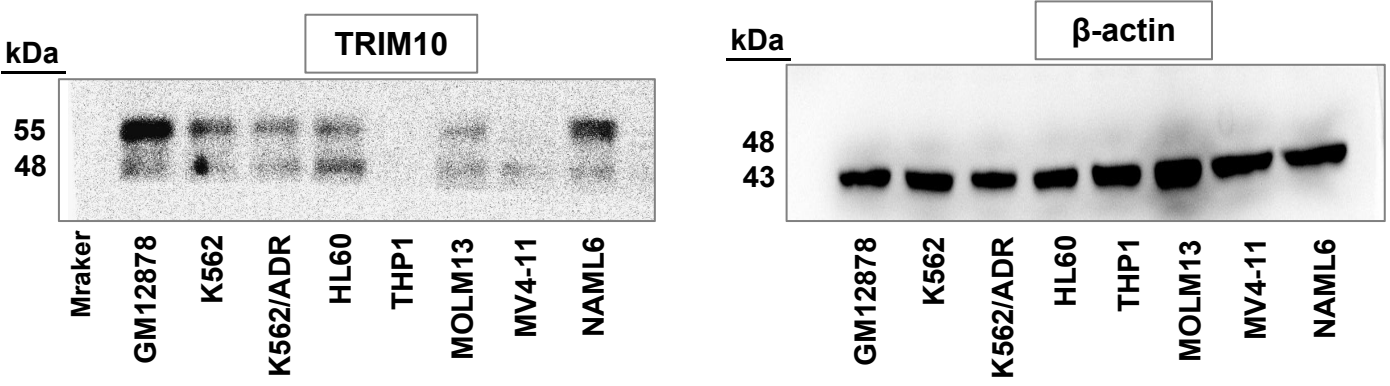

Figure 3B

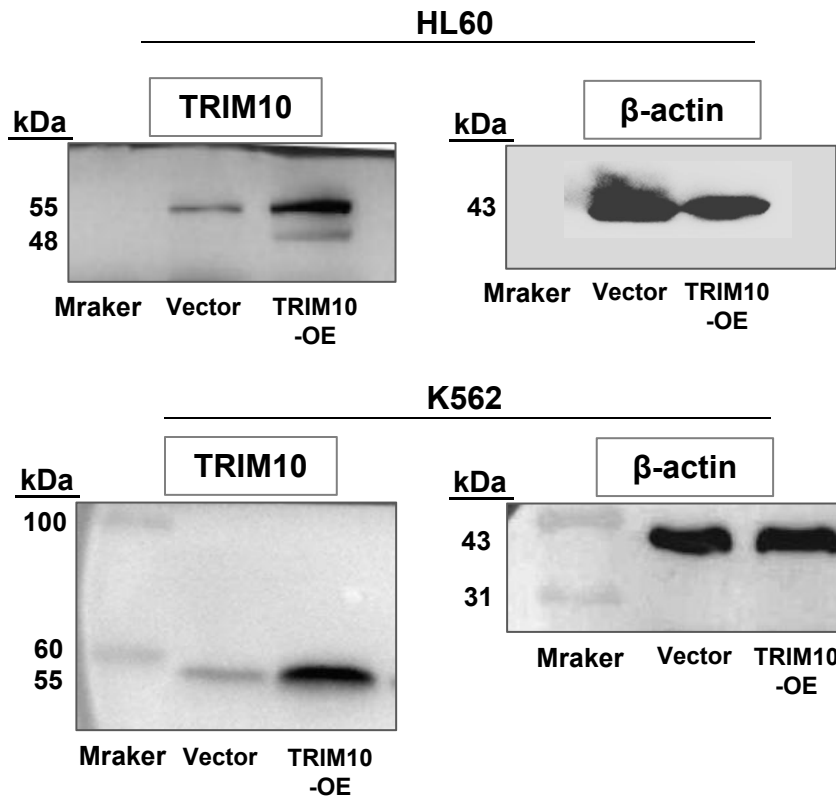

Figure 4A and 4B

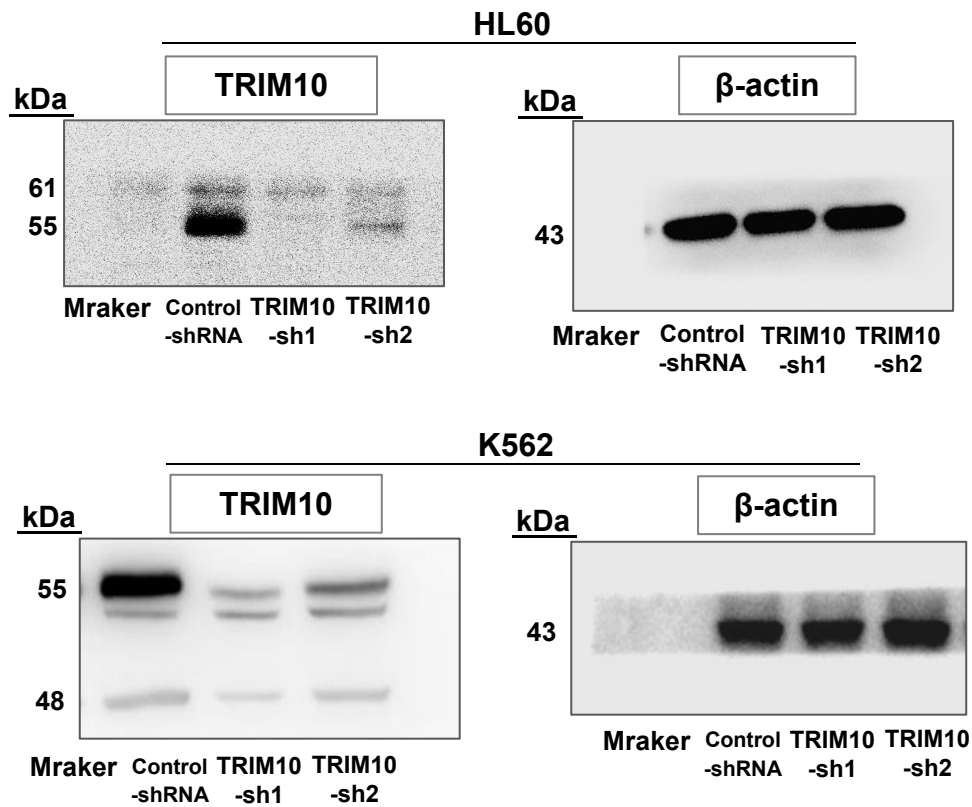

Figure 4C and 4D

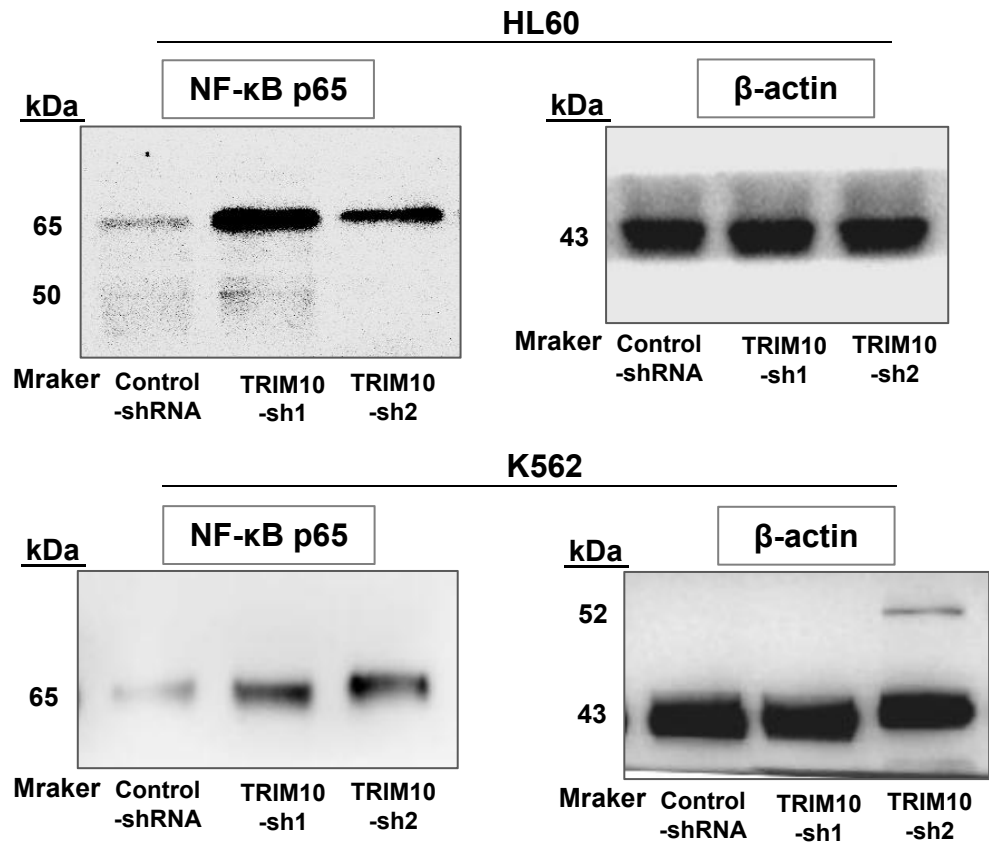

Figure 4G and 4H

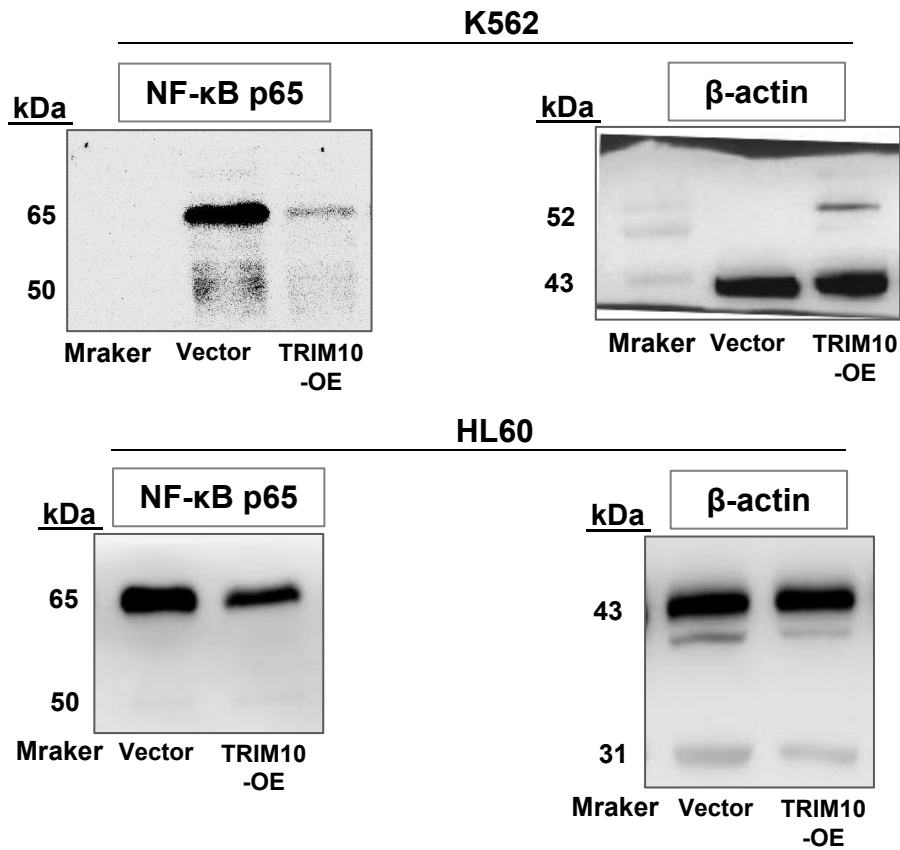

Supplement: s1 [file s1]
